# Supplementary material for: Analysis of viral integration reveals new insights of oncogenic mechanism in HBV-infected intrahepatic cholangiocarcinoma and combined hepatocellular-cholangiocarcinoma
Source: Springer Nature journal article supplement (doi:10.1007/s12072-022-10419-3), 2022-09-20
Supplement: MOESM2 [file 23516022]

Table S1. Demographic and clinicopathologic characteristics of ICC and CHC patients

| Variables                       | Patients          |                    |
|---------------------------------|-------------------|--------------------|
|                                 | ICC<br>(N=41)     | CHC<br>(N=20)      |
| Age(years)                      |                   |                    |
| Mean(SD)                        | 53.73(9.08)       | 51.10(11.13)       |
| Sex, n (%)                      |                   |                    |
| Male                            | 25(60.98)         | 16(80.00)          |
| Female                          | 16(39.02)         | 4(20.00)           |
| Cirrhosis, n (%)                |                   |                    |
| Non                             | 17(41.46)         | 0(0.00)            |
| Slight                          | 16(39.02)         | 6(30.00)           |
| Moderate                        | 5(12.20)          | 12(60.00)          |
| Severe                          | 3(7.32)           | 2(10.00)           |
| Tumor Capsular Integrity, n (%) |                   |                    |
| Non-intact                      | 36(87.80)         | 17(85.00)          |
| Intact                          | 5(12.20)          | 3(15.00)           |
| ALB, g/L                        |                   |                    |
| Mean(SD)                        | 41.40(3.51)       | 39.17(3.41)        |
| TBIL, $\mu$ mol/L               |                   |                    |
| Mean(SD)                        | 13.01(5.58)       | 12.76(4.44)        |
| PT, seconds                     |                   |                    |
| Mean(SD)                        | 12.07(1.07)       | 12.90(0.93)        |
| ALT, IU/L                       |                   |                    |
| Mean(SD)                        | 52.53(46.49)      | 48.95(48.43)       |
| AFP ,ng/mL                      |                   |                    |
| Mean(SD)                        | 98.74(279.54)     | 196.20(320.22)     |
| CA19-9, U/mL                    |                   |                    |
| Mean(SD)                        | 246.75(402.23)    | 46.74(94.67)       |
| HBV DNA, copies/mL, n (%)       |                   |                    |
| Mean(SD)                        | 404399.4(1010826) | 95704.55(207618.2) |
| NA                              | 5(12.20)          | 0(0.00)            |
| <1000                           | 22(53.66)         | 9(45.00)           |
| 1000-10000                      | 2(4.88)           | 3(15.00)           |
| 10000-100000                    | 6(14.63)          | 4(20.00)           |
| >100000                         | 6(14.63)          | 4(20.00)           |
| HBsAg, n (%)                    |                   |                    |
| Negative                        | 5(12.20)          | 0(0.00)            |
| Positive                        | 36(87.80)         | 20(100.00)         |
| HBeAg, n (%)                    |                   |                    |
| Negative                        | 30(73.17)         | 15(75.00)          |
| Positive                        | 11(26.83)         | 5(25.00)           |
